# Supplementary material for: Catalytic Pyrolysis of Waste-Printed Circuit Boards Using a Cu/Fe Bimetal Synergistic Effect to Enhance Debromination
Source: MDPI journal article supplement (doi:10.3390/su16073009), 2024-04-04
Supplement: s1 [file s1]

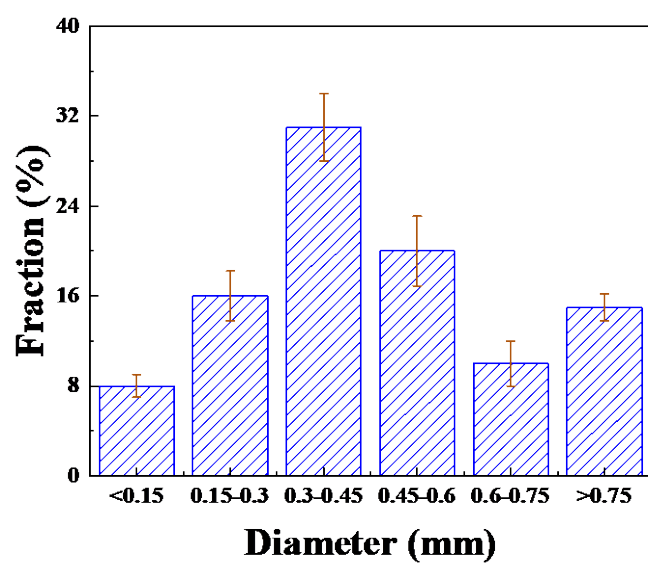

Figure S1 Size distribution of NM-WPCBs.

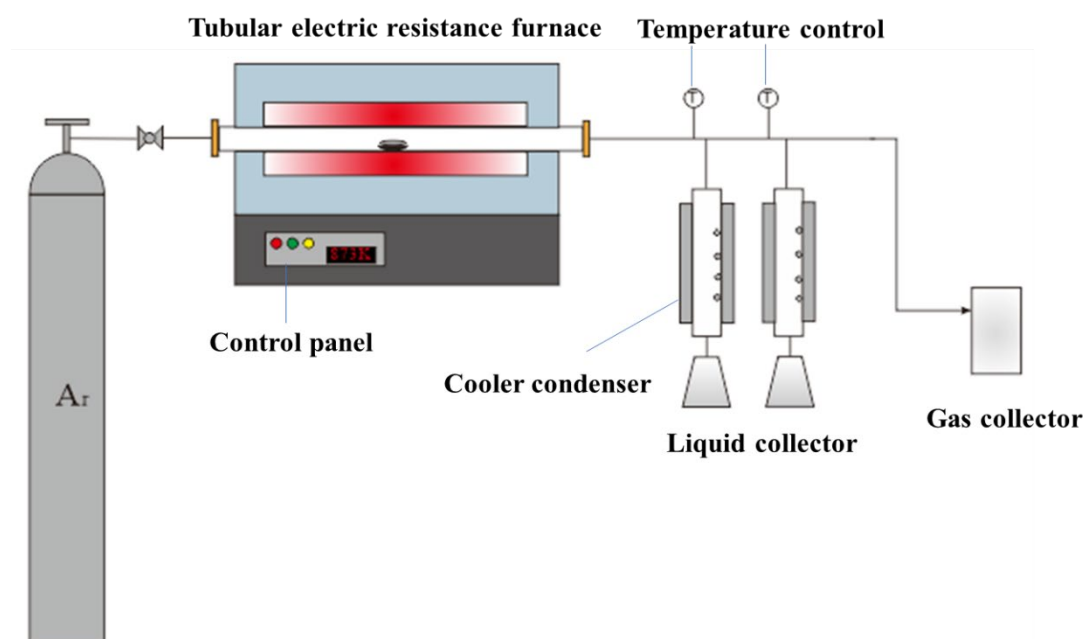

Figure S2 Schematic illustration of co-pyrolysis apparatus.

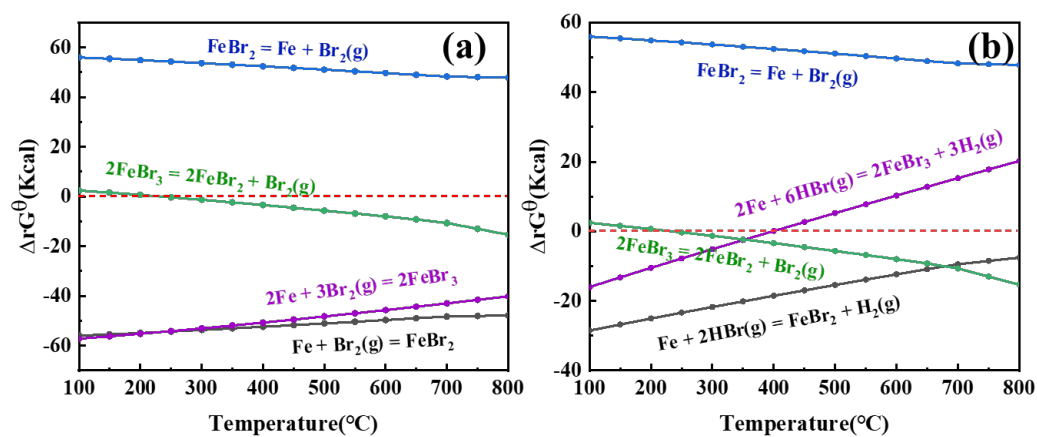

Figure S3 The relationship between  $\Delta G$  and temperature for the reaction of catalysts.

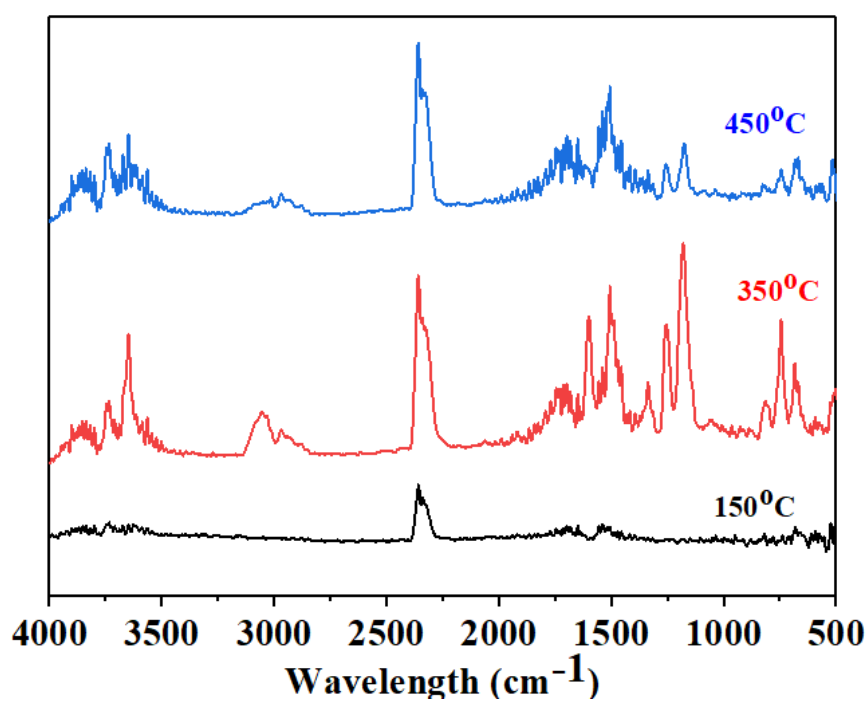

Figure S4 The spectrum of TG-FIIR at 150, 350 and 450  $^\circ\text{C}$ .

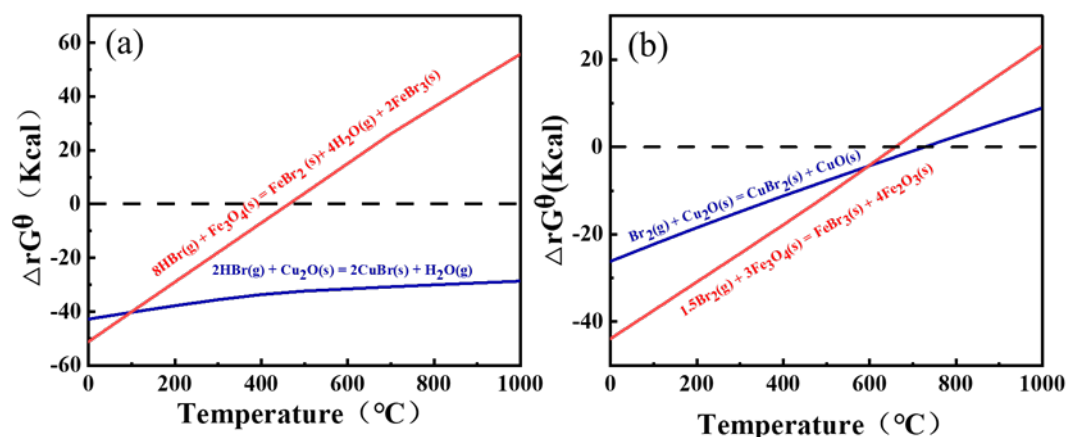

Figure S5 The relationship between  $\Delta G$  and temperature for the debromination of catalysts.

Table S1 Main compositions of pyrolysis liquid for co-pyrolysis of NM-WPCBs and Cu/Fe-0.20.

| Number | Ret. Time (min) | Aera (%) | Components                                                                        |
|--------|-----------------|----------|-----------------------------------------------------------------------------------|
| 1      | 8.096           | 47.16    | Phenol                                                                            |
| 2      | 9.881           | 2.86     | Phenol, 3-methyl-                                                                 |
| 3      | 10.2            | 0.33     | Phenol, 4-bromo-                                                                  |
| 4      | 10.47           | 0.94     | p-Cresol                                                                          |
| 5      | 11.153          | 1.19     | Benzofuran, 2,3-dihydro-2-methyl-                                                 |
| 6      | 12.002          | 0.25     | Phenol, 2-ethyl-                                                                  |
| 7      | 12.269          | 0.95     | Phenol, 2,5-dimethyl-                                                             |
| 8      | 12.751          | 1        | Phenol, 4-ethyl-                                                                  |
| 9      | 13.1            | 0.22     | 2H-1-Benzopyran, 3,4-dihydro-                                                     |
| 10     | 13.637          | 0.28     | Phenol, 2,3,6-trimethyl-                                                          |
| 11     | 13.975          | 0.09     | 1H-Benzimidazole, 5,6-dimethyl-                                                   |
| 12     | 14.057          | 0.1      | Phenol, 2-propyl-                                                                 |
| 13     | 14.212          | 21.5     | Phenol, 3-(1-methylethyl)-                                                        |
| 14     | 15.774          | 0.38     | Phenol, 2-methyl-5-(1-methylethyl)-                                               |
| 15     | 15.926          | 0.25     | Cyclohexasiloxane, dodecamethyl-                                                  |
| 16     | 16.624          | 0.83     | Benzenamine, -2,6-dimethyl-                                                       |
| 17     | 17.258          | 0.39     | Benzene, 1,2,3,4-tetramethyl-5-(1-methylethyl)-                                   |
| 18     | 17.533          | 0.16     | Phenol, 2,4-dimethyl                                                              |
| 19     | 26.338          | 0.36     | Phenol, 4,4'-(1-methylethylidene)bis-                                             |
| 20     | 26.436          | 0.34     | 4-Cyclohepta-2,4,6-trienyl-phenol                                                 |
| 21     | 29.28           | 0.2      | Hexadecanoic acid, ethyl ester                                                    |
| 22     | 29.737          | 1.72     | Benzaldehyde, 4,4'-[1,2-ethanediylbis(oxy)]bis-                                   |
| 23     | 29.933          | 0.14     | Octanedinitrile                                                                   |
| 24     | 30.015          | 3.25     | 2-Propanol, 1,3-diphenoxy-                                                        |
| 25     | 31.195          | 0.34     | phenol, 4,4'-[(1,4,5,6,7,7-hexachlorobicyclo [2.2.1]hept-5-en-2-yl)methylene]bis- |
| 26     | 31.287          | 0.39     | Phenol, 2,2'-methylenebis [4-methyl-                                              |
| 27     | 32.18           | 10.94    | Phenol, 4,4'-(1-methylethylidene)bis-                                             |
| 28     | 32.392          | 0.23     | Heptadecanoic acid, ethyl ester                                                   |
| 29     | 34.632          | 1.02     | 4H-1-Benzopyran, 3-bromo-4,4,5,8-tetramethyl-                                     |
| 30     | 34.829          | 0.39     | Phenol, 4-(1,1-dimethylpropyl)-                                                   |

Table S2 Main compositions of pyrolysis gas for co-pyrolysis of NM-WPCBs and Cu/Fe-0.20.

| Number | Ret. Time (min) | Aera (%) | Components      |
|--------|-----------------|----------|-----------------|
| 1      | 2.161           | 25.75    | Carbon dioxide  |
| 2      | 7.412           | 11.63    | Water           |
| 3      | 12.938          | 32.58    | Acetaldehyde    |
| 4      | 13.889          | 0.42     | Methane, bromo- |
| 5      | 18.937          | 6.43     | Furan           |
| 6      | 19.495          | 7.96     | Propanal        |
| 7      | 19.918          | 15.24    | Acetone         |
